# Supplementary material
Source: publisher figshare collection journal article supplement (https://frontiersin.figshare.com/ndownloader/files/20188752)
Supplement: Supplementary file 1 [file 20188752]

**Supplementary Figure S3.** Taxa accumulation curves and 95% confidence intervals (shaded region) derived from: mid-water trawls (purple) and eDNA water collections (grey). Mid-water trawl samples represent the 14 individual trawls and eDNA samples represent the 131 discrete water samples, including replicates and/or different depths at the sampling stations. In comparing these curves, it is important to note that taxa here is defined as data assigned to genus or family. Given that the majority of the taxa identified by eDNA were assigned a genus (n = 57 out of 65 taxa), there is not a large difference between the eDNA accumulation curves that include the two clades. For a thorough analysis of the RREAS cruise taxa accumulation curve and species diversity patterns, including vertebrate and invertebrate taxa, see Santora et al. (2017). The trawl data included in this study and in this figure represent a small subset of the data collected on annual cruises (usually well over 100 trawls) and are limited to those data that were paired with the eDNA samples.
